# Supplementary material for: Effects of Bisphenol A Stress on Activated Sludge in Sequential Batch Reactors and Functional Recovery
Source: MDPI journal article supplement (doi:10.3390/app12168026), 2022-08-10
Supplement: s1 [file s1]

# Supplementary Materials

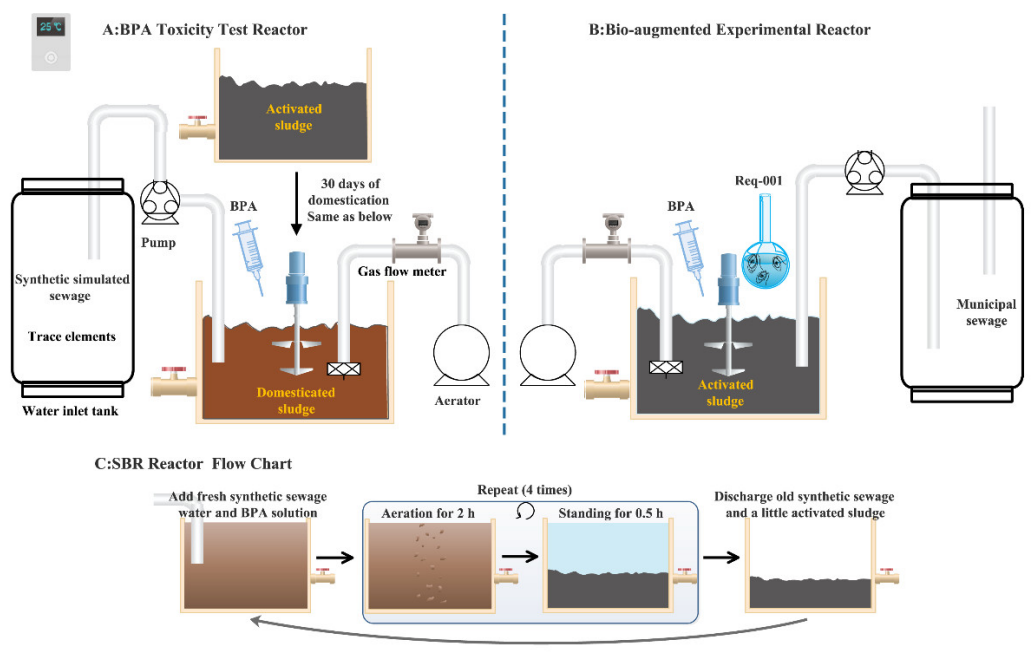

**Figure S1:** SBR reactor design diagram and flow chart. A: BPA Toxicity Test Reactor; B: Bio-augmented Experimental Reactor; C: SBR Reactor Flow Chart.

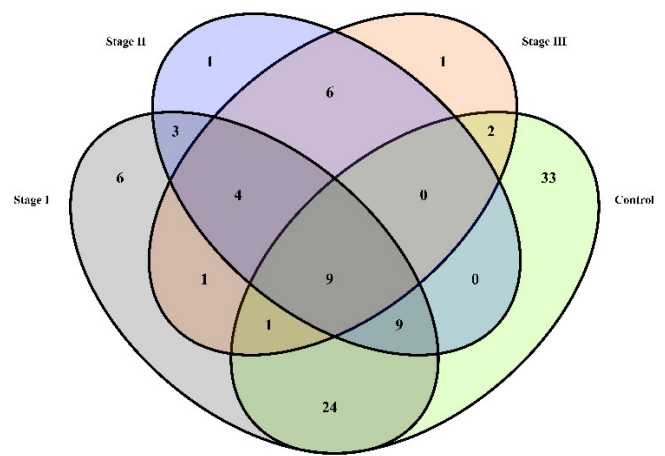

**Figure S2:** Each sample OTU-Venn drawn by different stages. The number of overlapping parts between multiple color graphs is the total number of OTUs among multiple samples, and the non-overlapping part is the number of unique OTUs of each sample.

| Table S1: Simulated sewage reagent content                      |               |
|-----------------------------------------------------------------|---------------|
| Reagent                                                         | Content (g/L) |
| C <sub>6</sub> H <sub>12</sub> O <sub>6</sub> ·H <sub>2</sub> O | 0.113         |
| CH <sub>3</sub> COONa                                           | 0.107         |
| C <sub>12</sub> H <sub>22</sub> O <sub>11</sub>                 | 0.107         |
| KH <sub>2</sub> PO <sub>4</sub>                                 | 0.070         |
| Na <sub>2</sub> CO <sub>3</sub>                                 | 0.060         |
| Beef Extract                                                    | 0.040         |

|                                                 |       |
|-------------------------------------------------|-------|
| Try Ptone                                       | 0.160 |
| NH <sub>4</sub> CL                              | 0.026 |
| (NH <sub>4</sub> ) <sub>2</sub> S0 <sub>4</sub> | 0.028 |

**Table S2:** Trace element composition content

| <b>Reagent</b>                                      | <b><u>Content (g/L)</u></b> |
|-----------------------------------------------------|-----------------------------|
| NiCl <sub>2</sub> ·6H <sub>2</sub> O                | 0.024                       |
| CuCl <sub>2</sub> ·2H <sub>2</sub> O                | 0.002                       |
| H <sub>3</sub> BO <sub>3</sub>                      | 0.006                       |
| ZnCl <sub>2</sub>                                   | 0.070                       |
| MnSO <sub>4</sub> ·H <sub>2</sub> O                 | 0.061                       |
| CoCl <sub>2</sub> ·6H <sub>2</sub> O                | 0.190                       |
| Na <sub>2</sub> MoO <sub>4</sub> ·2H <sub>2</sub> O | 0.024                       |
